# Supplementary material for: Neuroprotective Properties of a Novel Non-Thiazoledinedione Partial PPAR-γAgonist against MPTP
Source: Hindawi journal article supplement (doi:10.1155/2013/582809), 2013-01-01

**Supplementary Table 1. Primers used for RT-qPCR analysis of striatal and nigral tissue.**

| Gene                        | Forward Primer (5'-3')             | Reverse Primer (5'-3')             |
|-----------------------------|------------------------------------|------------------------------------|
| <b>Dopaminergic Markers</b> |                                    |                                    |
| TH                          | CTG GCC ATT GAT GTA CTG GA         | ACA CAC ATG GGA AAG CCT CT         |
| DAT                         | TGA ACT TTG GCC TAG CCT GT         | ACA TGG AGC CAC TCA GCT CT         |
| <b>Cellular Markers</b>     |                                    |                                    |
| GFAP                        | CGA GTC CCT AGA GCG GCA AAT G      | CGG ATC TGG AGG TTG GAG AAA GTC    |
| MAC-1                       | TTC TCA TGG TCA CCT CCT GC         | GGT CTG ACC ATC TGA ACC TG         |
| <b>Inflammatory Enzymes</b> |                                    |                                    |
| gp91 phox                   | CAG GAG TTC CAA GAT GCC TG         | GAT TGG CCT GAG ATT CAT CC         |
| p67phox                     | CAG CCA GCT TCG GAA CAT G          | GAC AGT ACC AGG ATT ACA TC         |
| <b>Cytokines</b>            |                                    |                                    |
| NFkB                        | GCG TAC ACA TTC TGG GGA GT         | ACC GAA GCA GGA GCT ATC AA         |
| <b>Antioxidant Markers</b>  |                                    |                                    |
| NQO1                        | GCG AGA AGA GCC CTG ATT GTA CTG    | TCT CAA ACC AGC CTT TCA GAA TGG    |
| HO1                         | CAA GCC GAG AAT GCT GAG TTC ATG    | GCA AGG GAT GAT TTC CTG CCA G      |
| GCLM                        | GCC ACC AGA TTT GAC TGC CTT TG     | TGC TCT TCA CGA TGA CCG AGT ACC    |
| GCLC                        | ACA TCT ACC ACGC AGT CAA GG ACC    | CTC AAG AAC ATC GCC TCC ATT CAG    |
| Peroxiredoxin 3             | CAC CCA GCA CGC GCC CTA TT         | GGC CCA CCG GAA GGT CGT TG         |
| Peroxiredoxin 5             | GTG TCT CTC TTT GGG AAT CGT C      | CTC AGA GTT GAG AGA GGA TGT TGG    |
| SOD2                        | GAC TGG CAG CAT TTA GGG TT         | GGA CCC AAT GAG CCA AAG AA         |
| Thioredoxin 2               | TCG CCA AGC AGC ACG GGA AG         | TGA CCC CCA CAC CAG TGG CA         |
| <b>Protein Kinases</b>      |                                    |                                    |
| AMPK                        | GGG GAC ACG CTT GGT GTC GG         | GCT GGA ACA GAC GGC GGC TT         |
| MAPK                        | CCT CAA GCC TGA AAA TCT GC         | GTC TCT GCG CTT CCA GTA CC         |
| <b>PPAR-γ markers</b>       |                                    |                                    |
| PPAR-γ                      | CCA GAG TCT GCT GAT CTG CG         | GCC ACC TCT TTG CTC TGA TC         |
| PGC1-α                      | TGA TGT GAA TGA CTT GGC TAC AGA CA | GCT CAT TGT TGT ACT GGT TGG ATA TG |
| <b>Housekeeping gene</b>    |                                    |                                    |
| Beta-actin                  | CAT GAA GAT CCT GAC CGA GCG TG     | TCT GCT GGA AGG TGG ACA GTG AGG    |

**Supplementary Table 2. Effect of LSN862 (LSN) on striatal mRNA expression.** Striatal tissue was collected at 24 hrs, 72 hrs, and 21 days after the last dose of MPTP and 24 hrs after LSN862. The groups were vehicle + PBS (24 hrs: n = 5; 72 hrs: n = 4; 21 days: n = 4); vehicle + MPTP (24 hrs: n = 5; 72 hrs: n = 5; 21 days: n = 6); 30 mg/kg LSN + PBS (24 hrs: n = 4; 72 hrs: n = 3; 21 days n = 4); 30 mg/kg LSN + MPTP (24 hrs: n = 5; 72 hrs n = 4; 21 days n = 5). All data are standardized to  $\beta$ -actin presented as mean  $\pm$  SEM compared to vehicle + PBS controls. Two-Way ANOVA with Repeated Measures: <sup>a</sup>Vehicle + PBS vs. Vehicle + MPTP,  $P < 0.05$ ; <sup>b</sup>Vehicle + MPTP vs. 30mg/kg LSN + MPTP,  $P < 0.05$ ; <sup>c</sup>Vehicle + PBS vs. 30mg/kg LSN + PBS,  $P < 0.05$ .

| Gene                                    | Vehicle + PBS   |                 |                 | Vehicle + MPTP                                  |                                                |                                                  | 30 mg/kg LSN + PBS                             |                                              |                 | 30 mg/kg LSN + MPTP                           |                                               |                                               |
|-----------------------------------------|-----------------|-----------------|-----------------|-------------------------------------------------|------------------------------------------------|--------------------------------------------------|------------------------------------------------|----------------------------------------------|-----------------|-----------------------------------------------|-----------------------------------------------|-----------------------------------------------|
|                                         | 24 hrs          | 72 hrs          | 21 days         | 24 hrs                                          | 72 hrs                                         | 21 days                                          | 24 hrs                                         | 72 hrs                                       | 21 days         | 24 hrs                                        | 72 hrs                                        | 21 days                                       |
| <b>Dopaminergic markers</b>             |                 |                 |                 |                                                 |                                                |                                                  |                                                |                                              |                 |                                               |                                               |                                               |
| TH                                      | 1.00 $\pm$ 0.34 | 1.00 $\pm$ 0.58 | 1.00 $\pm$ 0.09 | 0.37 $\pm$ 0.19                                 | 0.09 $\pm$ 0.06                                | 0.39 $\pm$ 0.08                                  | 0.98 $\pm$ 0.57                                | 0.98 $\pm$ 0.57                              | 1.30 $\pm$ 0.36 | 0.20 $\pm$ 0.06                               | 0.52 $\pm$ 0.01                               | 1.15 $\pm$ 0.51                               |
| DAT                                     | 1.00 $\pm$ 0.49 | 1.00 $\pm$ 0.65 | 1.00 $\pm$ 0.39 | 0.49 $\pm$ 0.21                                 | 0.004 $\pm$ 0.003                              | 0.27 $\pm$ 0.10                                  | 0.97 $\pm$ 0.36                                | 0.88 $\pm$ 0.01                              | 1.41 $\pm$ 0.73 | 0.45 $\pm$ 0.15                               | 0.30 $\pm$ 0.11                               | 1.20 $\pm$ 0.59                               |
| <b>Cellular Markers</b>                 |                 |                 |                 |                                                 |                                                |                                                  |                                                |                                              |                 |                                               |                                               |                                               |
| GFAP                                    | 1.00 $\pm$ 0.40 | 1.00 $\pm$ 0.35 | 1.00 $\pm$ 0.21 | <b>7.38 <math>\pm</math> 0.98<sup>ab</sup></b>  | <b>2.49 <math>\pm</math> 1.16<sup>a</sup></b>  | 0.95 $\pm$ 0.26                                  | 0.43 $\pm$ 0.03                                | 0.71 $\pm$ 0.67                              | 0.45 $\pm$ 0.15 | <b>0.92 <math>\pm</math> 0.22<sup>b</sup></b> | 0.77 $\pm$ 0.46                               | 0.51 $\pm$ 0.14                               |
| MAC-1                                   | 1.00 $\pm$ 0.42 | 1.00 $\pm$ 0.42 | 1.00 $\pm$ 0.17 | <b>4.13 <math>\pm</math> 1.26<sup>ab</sup></b>  | 4.92 $\pm$ 2.83                                | 0.83 $\pm$ 0.23                                  | 0.85 $\pm$ 0.21                                | 0.70 $\pm$ 0.04                              | 0.94 $\pm$ 0.35 | <b>1.55 <math>\pm</math> 0.56<sup>b</sup></b> | 0.23 $\pm$ 0.18                               | 0.99 $\pm$ 0.15                               |
| <b>Inflammatory Enzymes</b>             |                 |                 |                 |                                                 |                                                |                                                  |                                                |                                              |                 |                                               |                                               |                                               |
| gp91phox                                | 1.00 $\pm$ 0.58 | 1.00 $\pm$ 0.48 | 1.00 $\pm$ 0.44 | <b>2.5 <math>\pm</math> 0.39<sup>ab</sup></b>   | 0.31 $\pm$ 0.17                                | 0.10 $\pm$ 0.03                                  | 0.95 $\pm$ 0.62                                | 0.10 $\pm$ 0.08                              | 0.07 $\pm$ 0.01 | <b>1.14 <math>\pm</math> 0.38<sup>b</sup></b> | 0.15 $\pm$ 0.08                               | 0.10 $\pm$ 0.03                               |
| p67phox                                 | 1.00 $\pm$ 0.37 | 1.00 $\pm$ 0.32 | 1.00 $\pm$ 0.36 | 1.40 $\pm$ 0.58                                 | 0.02 $\pm$ 0.01                                | <b>37.48 <math>\pm</math> 11.47<sup>ab</sup></b> | 0.86 $\pm$ 0.36                                | 0.05 $\pm$ 0.003                             | 2.46 $\pm$ 0.47 | 0.02 $\pm$ 0.01                               | 0.47 $\pm$ 0.44                               | <b>2.74 <math>\pm</math> 1.31<sup>b</sup></b> |
| NFkB                                    | 1.00 $\pm$ 0.16 | 1.00 $\pm$ 0.59 | 1.00 $\pm$ 0.15 | <b>5.80 <math>\pm</math> 3.45<sup>a</sup></b>   | 0.03 $\pm$ 0.02                                | 0.18 $\pm$ 0.04                                  | 2.02 $\pm$ 1.33                                | 0.71 $\pm$ 0.25                              | 0.19 $\pm$ 0.05 | 3.43 $\pm$ 1.01                               | 0.33 $\pm$ 0.16                               | 0.14 $\pm$ 0.04                               |
| <b>Antioxidant Markers</b>              |                 |                 |                 |                                                 |                                                |                                                  |                                                |                                              |                 |                                               |                                               |                                               |
| NQO1                                    | 1.00 $\pm$ 0.37 | 1.00 $\pm$ 0.43 | 1.00 $\pm$ 0.18 | <b>5.00 <math>\pm</math> 1.94<sup>ab</sup></b>  | 0.51 $\pm$ 0.25                                | 0.12 $\pm$ 0.02                                  | 0.91 $\pm$ 0.27                                | 0.85 $\pm$ 0.79                              | 0.34 $\pm$ 0.12 | <b>2.31 <math>\pm</math> 0.72<sup>b</sup></b> | 1.46 $\pm$ 0.63                               | 0.11 $\pm$ 0.02                               |
| HO-1                                    | 1.00 $\pm$ 0.11 | 1.00 $\pm$ 0.49 | 1.00 $\pm$ 0.48 | 2.27 $\pm$ 0.20                                 | 0.18 $\pm$ 0.09                                | 2.57 $\pm$ 0.84                                  | 1.11 $\pm$ 0.25                                | 0.61 $\pm$ 0.43                              | 1.81 $\pm$ 1.49 | 0.92 $\pm$ 0.35                               | 1.23 $\pm$ 0.44                               | 2.69 $\pm$ 0.92                               |
| GCLM                                    | 1.00 $\pm$ 0.34 | 1.00 $\pm$ 0.45 | 1.00 $\pm$ 0.46 | 1.55 $\pm$ 0.46                                 | <b>5.80 <math>\pm</math> 2.82<sup>a</sup></b>  | 1.02 $\pm$ 0.31                                  | 0.56 $\pm$ 0.21                                | 1.32 $\pm$ 0.66                              | 1.16 $\pm$ 0.32 | 0.96 $\pm$ 0.30                               | 4.07 $\pm$ 1.79                               | 1.24 $\pm$ 0.40                               |
| GCLC                                    | 1.00 $\pm$ 0.38 | 1.00 $\pm$ 0.41 | 1.00 $\pm$ 0.09 | 3.75 $\pm$ 1.23                                 | <b>12.92 <math>\pm</math> 3.65<sup>a</sup></b> | 0.15 $\pm$ 0.07                                  | 2.01 $\pm$ 0.92                                | 0.87 $\pm$ 0.26                              | 0.08 $\pm$ 0.02 | 1.69 $\pm$ 0.81                               | 15.47 $\pm$ 3.32                              | 0.03 $\pm$ 0.01                               |
| Peroxiredoxin 5                         | 1.00 $\pm$ 0.47 | 1.00 $\pm$ 0.35 | 1.00 $\pm$ 0.36 | 0.31 $\pm$ 0.12                                 | 1.24 $\pm$ 0.62                                | 0.58 $\pm$ 0.15                                  | 0.58 $\pm$ 0.16                                | 0.83 $\pm$ 0.17                              | 0.70 $\pm$ 0.23 | 0.45 $\pm$ 0.39                               | 0.74 $\pm$ 0.40                               | 0.41 $\pm$ 0.08                               |
| SOD2                                    | 1.00 $\pm$ 0.51 | 1.00 $\pm$ 0.17 | 1.00 $\pm$ 0.32 | 0.45 $\pm$ 0.14                                 | 0.05 $\pm$ 0.02                                | 0.44 $\pm$ 0.14                                  | 0.16 $\pm$ 0.05                                | 1.34 $\pm$ 0.91                              | 0.28 $\pm$ 0.06 | 0.88 $\pm$ 0.38                               | 0.51 $\pm$ 0.20                               | 0.35 $\pm$ 0.09                               |
| Thioredoxin 2                           | 1.00 $\pm$ 0.54 | 1.00 $\pm$ 0.51 | 1.00 $\pm$ 0.40 | 2.55 $\pm$ 0.56                                 | 0.78 $\pm$ 0.30                                | 0.62 $\pm$ 0.21                                  | 0.72 $\pm$ 0.21                                | 0.06 $\pm$ 0.01                              | 0.51 $\pm$ 0.18 | 1.14 $\pm$ 0.49                               | 0.42 $\pm$ 0.41                               | 0.22 $\pm$ 0.05                               |
| <b>Protein Kinases</b>                  |                 |                 |                 |                                                 |                                                |                                                  |                                                |                                              |                 |                                               |                                               |                                               |
| AMPK                                    | 1.00 $\pm$ 0.16 | 1.00 $\pm$ 0.47 | 1.00 $\pm$ 0.36 | <b>3.41 <math>\pm</math> 0.56<sup>ab</sup></b>  | <b>0.68 <math>\pm</math> 0.20<sup>b</sup></b>  | 0.06 $\pm$ 0.02                                  | <b>2.79 <math>\pm</math> 1.03<sup>c</sup></b>  | 1.18 $\pm$ 0.69                              | 0.62 $\pm$ 0.27 | <b>1.82 <math>\pm</math> 0.66<sup>b</sup></b> | <b>3.73 <math>\pm</math> 0.85<sup>b</sup></b> | 0.13 $\pm$ 0.03                               |
| MAPK                                    | 1.00 $\pm$ 0.58 | 1.00 $\pm$ 0.08 | 1.00 $\pm$ 0.35 | 0.05 $\pm$ 0.02                                 | 0.03 $\pm$ 0.01                                | 0.41 $\pm$ 0.09                                  | <b>13.31 <math>\pm</math> 8.74<sup>c</sup></b> | 1.69 $\pm$ 1.19                              | 5.36 $\pm$ 4.92 | 4.34 $\pm$ 2.64                               | 3.15 $\pm$ 0.90                               | 4.93 $\pm$ 2.23                               |
| <b>PPAR-<math>\gamma</math> markers</b> |                 |                 |                 |                                                 |                                                |                                                  |                                                |                                              |                 |                                               |                                               |                                               |
| PPAR- $\gamma$                          | 1.00 $\pm$ 0.35 | 1.00 $\pm$ 0.17 | 1.00 $\pm$ 0.31 | <b>2.04 <math>\pm</math> 0.25<sup>ab</sup></b>  | <b>0.30 <math>\pm</math> 0.12<sup>a</sup></b>  | 0.39 $\pm$ 0.08                                  | 1.39 $\pm$ 0.33                                | <b>7.01 <math>\pm</math> 1.5<sup>c</sup></b> | 0.91 $\pm$ 0.31 | <b>0.63 <math>\pm</math> 0.25<sup>b</sup></b> | 3.56 $\pm$ 0.64                               | 1.09 $\pm$ 0.32                               |
| PGC1- $\alpha$                          | 1.00 $\pm$ 0.42 | 1.00 $\pm$ 0.57 | 1.00 $\pm$ 0.49 | <b>22.65 <math>\pm</math> 0.57<sup>ab</sup></b> | 0.10 $\pm$ 0.42                                | 0.31 $\pm$ 0.07                                  | 0.35 $\pm$ 0.23                                | 0.37 $\pm$ 0.23                              | 0.58 $\pm$ 0.07 | <b>0.44 <math>\pm</math> 0.19<sup>b</sup></b> | 0.61 $\pm$ 0.20                               | 0.43 $\pm$ 0.13                               |

**Supplementary Table 3. Effect of LSN862 (LSN) on nigral mRNA expression.** Substantia nigra tissue was collected at 24 hrs, 72 hrs, and 21 days after the last dose of MPTP and 24 hrs after LSN862. The groups were vehicle + PBS (24 hrs: n = 5; 72 hrs: n = 4; 21 days: n = 4); vehicle + MPTP (24 hrs: n = 5; 72 hrs: n = 5; 21 days: n = 6); 30 mg/kg LSN + PBS (24 hrs: n = 4; 72 hrs: n = 3; 21 days: n = 4); 30 mg/kg LSN + MPTP (24 hrs: n = 5; 72 hrs: n = 4; 21 days: n = 5). All data are standardized to  $\beta$ -actin presented as mean  $\pm$  SEM compared to vehicle + PBS controls. Two-Way ANOVA with Repeated Measures: <sup>a</sup>Vehicle + PBS vs. Vehicle + MPTP,  $P < 0.05$ ; <sup>b</sup>Vehicle + MPTP vs. 30mg/kg LSN + MPTP,  $P < 0.05$ ; <sup>c</sup>Vehicle + PBS vs. 30mg/kg LSN + PBS,  $P < 0.05$ .

| Gene                                    | Vehicle + PBS   |                 |                 | Vehicle + MPTP                                    |                                                 |                                                 | 30 mg/kg LSN + PBS |                 |                    | 30 mg/kg LSN + MPTP                             |                                               |                                               |
|-----------------------------------------|-----------------|-----------------|-----------------|---------------------------------------------------|-------------------------------------------------|-------------------------------------------------|--------------------|-----------------|--------------------|-------------------------------------------------|-----------------------------------------------|-----------------------------------------------|
|                                         | 24 hrs          | 72 hrs          | 21 days         | 24 hrs                                            | 72 hrs                                          | 21 days                                         | 24 hrs             | 72 hrs          | 21 days            | 24 hrs                                          | 72 hrs                                        | 21 days                                       |
| <b>Dopaminergic markers</b>             |                 |                 |                 |                                                   |                                                 |                                                 |                    |                 |                    |                                                 |                                               |                                               |
| TH                                      | 1.00 $\pm$ 0.53 | 1.00 $\pm$ 0.35 | 1.00 $\pm$ 0.45 | 0.06 $\pm$ 0.04                                   | 0.02 $\pm$ 0.01                                 | 0.17 $\pm$ 0.04                                 | 1.27 $\pm$ 0.75    | 0.86 $\pm$ 0.33 | 1.33 $\pm$ 0.53    | 0.58 $\pm$ 0.32                                 | 0.15 $\pm$ 0.04                               | 0.47 $\pm$ 0.34                               |
| DAT                                     | 1.00 $\pm$ 0.66 | 1.00 $\pm$ 0.62 | 1.00 $\pm$ 0.41 | 0.06 $\pm$ 0.05                                   | 0.62 $\pm$ 0.26                                 | 0.12 $\pm$ 0.04                                 | 1.45 $\pm$ 0.77    | 1.15 $\pm$ 0.32 | 1.33 $\pm$ 0.74    | 0.18 $\pm$ 0.09                                 | 0.58 $\pm$ 0.22                               | 0.32 $\pm$ 0.05                               |
| <b>Cellular Markers</b>                 |                 |                 |                 |                                                   |                                                 |                                                 |                    |                 |                    |                                                 |                                               |                                               |
| GFAP                                    | 1.00 $\pm$ 0.29 | 1.00 $\pm$ 0.47 | 1.00 $\pm$ 0.40 | <b>262.7 <math>\pm</math> 76.92<sup>a,b</sup></b> | 3.84 $\pm$ 1.39                                 | 1.39 $\pm$ 0.65                                 | 32.0 $\pm$ 6.96    | 0.04 $\pm$ 0.02 | 0.90 $\pm$ 0.72    | <b>18.96 <math>\pm</math> 10.82<sup>b</sup></b> | 0.15 $\pm$ 0.09                               | 1.58 $\pm$ 0.63                               |
| MAC-1                                   | 1.00 $\pm$ 0.35 | 1.00 $\pm$ 0.33 | 1.00 $\pm$ 0.10 | <b>5.16 <math>\pm</math> 2.43<sup>a,b</sup></b>   | <b>3.24 <math>\pm</math> 0.46<sup>a,b</sup></b> | 2.32 $\pm$ 0.72                                 | 1.47 $\pm$ 0.62    | 0.03 $\pm$ 0.01 | 1.34 $\pm$ 0.32    | <b>1.38 <math>\pm</math> 0.91<sup>b</sup></b>   | <b>0.80 <math>\pm</math> 0.53<sup>b</sup></b> | 2.06 $\pm$ 0.80                               |
| <b>Inflammatory Enzymes</b>             |                 |                 |                 |                                                   |                                                 |                                                 |                    |                 |                    |                                                 |                                               |                                               |
| gp91phox                                | 1.00 $\pm$ 0.46 | 1.00 $\pm$ 0.30 | 1.00 $\pm$ 0.62 | <b>7.12 <math>\pm</math> 3.11<sup>a,b</sup></b>   | 0.74 $\pm$ 0.32                                 | 1.18 $\pm$ 0.52                                 | 1.03 $\pm$ 0.56    | 0.20 $\pm$ 0.18 | 3.15 $\pm$ 0.81    | <b>1.63 <math>\pm</math> 0.92<sup>b</sup></b>   | 0.89 $\pm$ 0.44                               | 1.02 $\pm$ 0.24                               |
| p67phox                                 | 1.00 $\pm$ 0.32 | 1.00 $\pm$ 0.29 | N/A             | <b>4.47 <math>\pm</math> 1.99<sup>b</sup></b>     | <b>2.75 <math>\pm</math> 1.20<sup>a,b</sup></b> | N/A                                             | 0.70 $\pm$ 0.39    | 0.30 $\pm$ 0.12 | N/A                | <b>0.09 <math>\pm</math> 0.03<sup>b</sup></b>   | <b>0.94 <math>\pm</math> 0.79<sup>b</sup></b> | N/A                                           |
| NFkB                                    | 1.00 $\pm$ 0.35 | 1.00 $\pm$ 0.14 | 1.00 $\pm$ 0.47 | 3.29 $\pm$ 1.20                                   | 0.54 $\pm$ 0.24                                 | 1.05 $\pm$ 0.39                                 | 0.37 $\pm$ 0.17    | 0.15 $\pm$ 0.13 | 0.94 $\pm$ 0.22    | 2.40 $\pm$ 0.73                                 | 0.02 $\pm$ 0.01                               | 0.62 $\pm$ 0.22                               |
| <b>Antioxidant Markers</b>              |                 |                 |                 |                                                   |                                                 |                                                 |                    |                 |                    |                                                 |                                               |                                               |
| NQO1                                    | 1.00 $\pm$ 0.38 | 1.00 $\pm$ 0.22 | 1.00 $\pm$ 0.34 | <b>5.66 <math>\pm</math> 1.86<sup>a</sup></b>     | 0.88 $\pm$ 0.32                                 | 0.68 $\pm$ 0.10                                 | 0.98 $\pm$ 0.46    | 0.08 $\pm$ 0.05 | 1.13 $\pm$ 0.38    | 4.29 $\pm$ 1.81                                 | 0.34 $\pm$ 0.14                               | 0.33 $\pm$ 0.10                               |
| HO-1                                    | 1.00 $\pm$ 0.24 | 1.00 $\pm$ 0.10 | 1.00 $\pm$ 0.62 | 1.01 $\pm$ 0.20                                   | 0.35 $\pm$ 0.13                                 | 1.63 $\pm$ 0.47                                 | 0.51 $\pm$ 0.12    | 0.67 $\pm$ 0.25 | 8.35 $\pm$ 4.99    | 2.47 $\pm$ 1.15                                 | 0.38 $\pm$ 0.06                               | 0.82 $\pm$ 0.29                               |
| GCLM                                    | 1.00 $\pm$ 0.21 | 1.00 $\pm$ 0.40 | 1.00 $\pm$ 0.04 | 1.72 $\pm$ 0.25                                   | <b>3.06 <math>\pm</math> 0.53<sup>a</sup></b>   | 0.01 $\pm$ 0.002                                | 0.78 $\pm$ 0.38    | 0.99 $\pm$ 0.42 | 0.001 $\pm$ 0.0005 | 1.43 $\pm$ 0.50                                 | 2.47 $\pm$ 0.76                               | 0.003 $\pm$ 0.0009                            |
| GCLC                                    | 1.00 $\pm$ 0.28 | 1.00 $\pm$ 0.30 | 1.00 $\pm$ 0.07 | <b>3.42 <math>\pm</math> 0.96<sup>a</sup></b>     | <b>3.09 <math>\pm</math> 1.10<sup>a</sup></b>   | 0.06 $\pm$ 0.004                                | 0.27 $\pm$ 0.16    | 0.31 $\pm$ 0.14 | 0.02 $\pm$ 0.01    | 1.94 $\pm$ 0.85                                 | 6.11 $\pm$ 1.85                               | 0.02 $\pm$ 0.006                              |
| Peroxioredoxin 5                        | 1.00 $\pm$ 0.29 | 1.00 $\pm$ 0.36 | 1.00 $\pm$ 0.19 | 2.23 $\pm$ 0.61                                   | 0.80 $\pm$ 0.19                                 | 0.96 $\pm$ 0.26                                 | 6.31 $\pm$ 3.76    | 0.24 $\pm$ 0.21 | 0.72 $\pm$ 0.06    | 3.24 $\pm$ 1.31                                 | 0.64 $\pm$ 0.45                               | 0.89 $\pm$ 0.31                               |
| SOD2                                    | 1.00 $\pm$ 0.35 | 1.00 $\pm$ 0.39 | 1.00 $\pm$ 0.42 | 0.74 $\pm$ 0.21                                   | 0.23 $\pm$ 0.15                                 | <b>2.53 <math>\pm</math> 0.38<sup>a,b</sup></b> | 0.09 $\pm$ 0.04    | 0.03 $\pm$ 0.01 | 1.29 $\pm$ 0.38    | 1.04 $\pm$ 0.38                                 | 0.07 $\pm$ 0.04                               | <b>1.14 <math>\pm</math> 0.31<sup>b</sup></b> |
| Thioredoxin 2                           | 1.00 $\pm$ 0.43 | 1.00 $\pm$ 0.15 | 1.00 $\pm$ 0.40 | 0.62 $\pm$ 0.09                                   | 3.09 $\pm$ 1.49                                 | 0.62 $\pm$ 0.22                                 | 0.40 $\pm$ 0.21    | 0.29 $\pm$ 0.15 | 0.51 $\pm$ 0.19    | 0.72 $\pm$ 0.29                                 | 0.13 $\pm$ 0.04                               | 0.22 $\pm$ 0.05                               |
| <b>Protein Kinases</b>                  |                 |                 |                 |                                                   |                                                 |                                                 |                    |                 |                    |                                                 |                                               |                                               |
| AMPK                                    | 1.00 $\pm$ 0.41 | 1.00 $\pm$ 0.39 | 1.00 $\pm$ 0.27 | 1.93 $\pm$ 0.02                                   | 3.40 $\pm$ 2.04                                 | 0.37 $\pm$ 0.13                                 | 4.40 $\pm$ 2.53    | 0.91 $\pm$ 0.33 | 0.37 $\pm$ 0.09    | 13.12 $\pm$ 8.55                                | 0.76 $\pm$ 0.15                               | 0.22 $\pm$ 0.05                               |
| MAPK                                    | 1.00 $\pm$ 0.27 | 1.00 $\pm$ 0.66 | 1.00 $\pm$ 0.19 | 0.04 $\pm$ 0.01                                   | 0.17 $\pm$ 0.08                                 | 1.01 $\pm$ 0.18                                 | 0.51 $\pm$ 0.15    | 2.98 $\pm$ 1.81 | 0.62 $\pm$ 0.05    | 2.67 $\pm$ 1.39                                 | 1.92 $\pm$ 0.76                               | 0.37 $\pm$ 0.05                               |
| <b>PPAR-<math>\gamma</math> markers</b> |                 |                 |                 |                                                   |                                                 |                                                 |                    |                 |                    |                                                 |                                               |                                               |
| PPAR- $\gamma$                          | 1.00 $\pm$ 0.15 | 1.00 $\pm$ 0.43 | 1.00 $\pm$ 0.47 | 0.87 $\pm$ 0.28                                   | 0.02 $\pm$ 0.01                                 | 1.90 $\pm$ 1.14                                 | 0.37 $\pm$ 0.18    | 4.95 $\pm$ 1.67 | 0.71 $\pm$ 0.17    | 0.90 $\pm$ 0.54                                 | 1.89 $\pm$ 0.5                                | 0.99 $\pm$ 0.30                               |
| PGC1-a                                  | 1.00 $\pm$ 0.14 | 1.00 $\pm$ 0.33 | 1.00 $\pm$ 0.25 | 7.25 $\pm$ 4.12                                   | 0.19 $\pm$ 0.06                                 | 0.57 $\pm$ 0.12                                 | 0.79 $\pm$ 0.23    | 0.12 $\pm$ 0.06 | 0.85 $\pm$ 0.22    | 2.93 $\pm$ 1.32                                 | 0.11 $\pm$ 0.01                               | 0.43 $\pm$ 0.15                               |

## Supplementary Figure Legends

**Supplementary Figure 1.** LSN862 confers neuroprotection against MPTP toxicity in ARE-hPAP mice. Striata from ARE-hPAP mice were harvested 7 days after the last dose of MPTP and 24 hrs after treatment with LSN. A) Western blot of TH protein levels. B) Densitometric analysis of TH western blot relative to  $\beta$ -actin (means  $\pm$  SEM). Groups: vehicle + PBS (n = 7), vehicle + MPTP (n = 7), 30 mg/kg LSN + PBS (n = 8), 30 mg/kg LSN + MPTP (n = 6). #  $P = 0.029$  (vehicle + PBS vs. vehicle + MPTP), \*  $P = 0.05$ , (vehicle + MPTP vs. 30 mg/kg LSN + MPTP). HPLC analysis of striatal catecholamine levels vehicle + PBS (n = 8), vehicle + MPTP (n = 9), 30 mg/kg LSN + PBS (n = 9), 30 mg/kg LSN + MPTP (n = 7), C) Dopamine: #  $P = 0.003$  (vehicle + PBS vs. vehicle + MPTP). D) DOPAC: #  $P = 0.022$  (vehicle + PBS vs. vehicle + MPTP). E) HVA: #  $P = 0.014$  (vehicle + PBS vs. vehicle + MPTP), F) HVA:DA ratio.

**Supplementary Figure 2.** LSN862 does not affect striatal and nigral hPAP activity in ARE-hPAP mice. Groups: vehicle + PBS (n = 5), vehicle + MPTP (n = 5), 30 mg/kg LSN + PBS (n = 3), 30 mg/kg LSN + MPTP (n = 5). A) Striatal hPAP activity levels (means  $\pm$  SEM). #  $P = 0.040$  (vehicle + PBS vs. vehicle + MPTP). B) Nigral hPAP activity levels; #  $P = 0.031$  (vehicle + PBS vs. vehicle + MPTP).

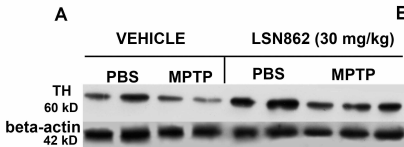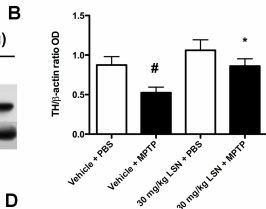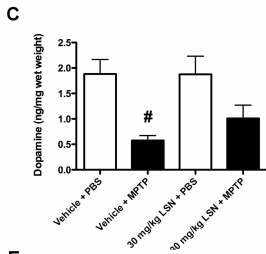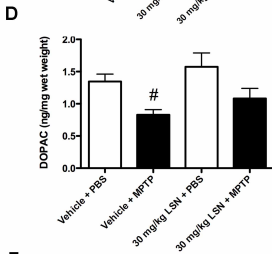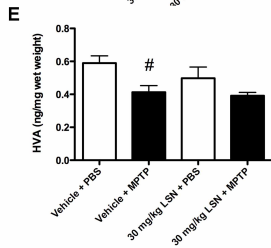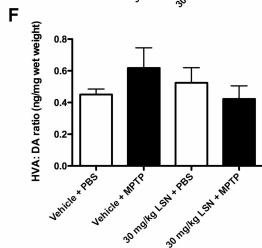

**A****Striatal hPAP activity**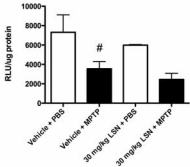**B****Nigral hPAP activity**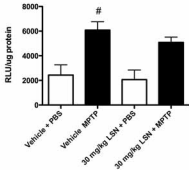

Supplement: f1 [file 582809.f1.pdf]
